# Supplementary material
Source: MDPI journal article supplement (https://www.mdpi.com/2073-4352/8/10/367)
Supplement: s1 [file s1]

Supporting information:

## Size-Controllable Synthesis of Zeolitic Imidazolate Framework/Carbon Nanotube Composites

Fang Fu <sup>1</sup>, Bin Zheng <sup>1,\*</sup>, Lin-Hua Xie <sup>2</sup>, Huiling Du <sup>1</sup>, Shuangming Du <sup>1</sup>, and Zhenhua Dong <sup>3</sup>

<sup>1</sup> School of Materials Science and Engineering, Xi'an University of Science and Technology, Xi'an 710054, P. R. China

<sup>2</sup> Beijing Key Laboratory for Green Catalysis and Separation, College of Environmental and Energy Engineering, Beijing University of Technology, Beijing 100124, P. R. China

<sup>3</sup> College of Chemistry, Chemical and Environmental Engineering, Henan University of Technology, Zhenzhou 450001, P. R. China

Corresponding authors. E-mail address: zhengbin@xust.edu.cn (B. Zheng)

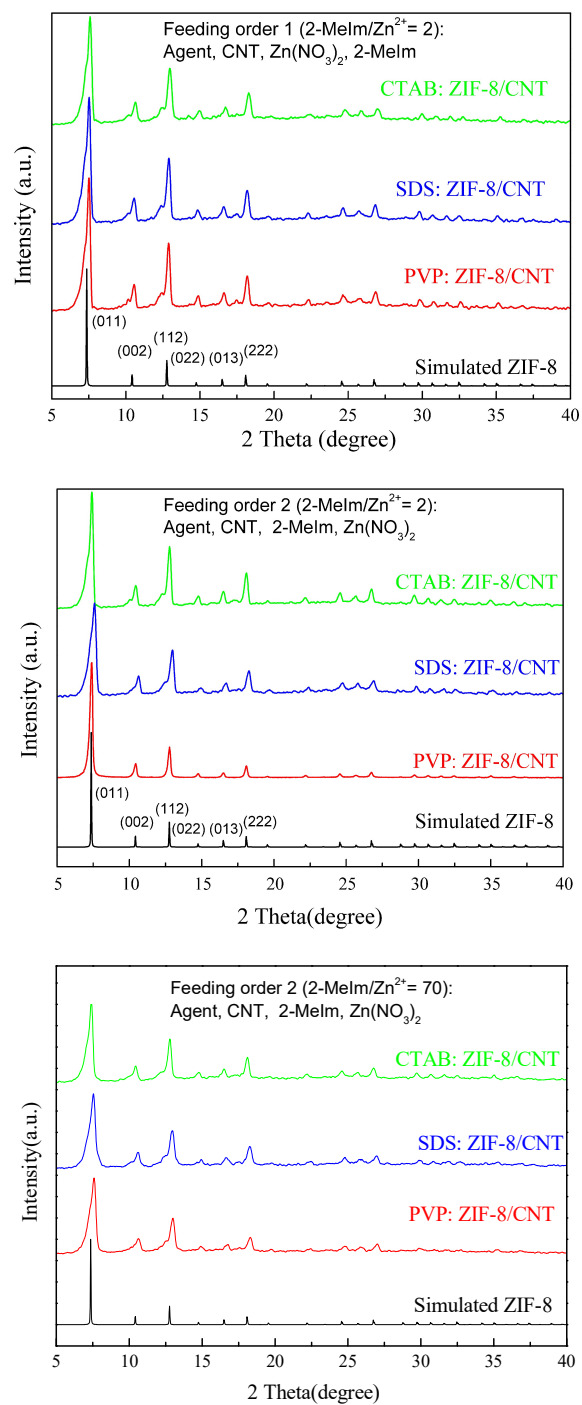

Figure S1. PXRD patterns of simulated ZIF-8 and synthesized ZIF-8/CNT composites under different reaction conditions.

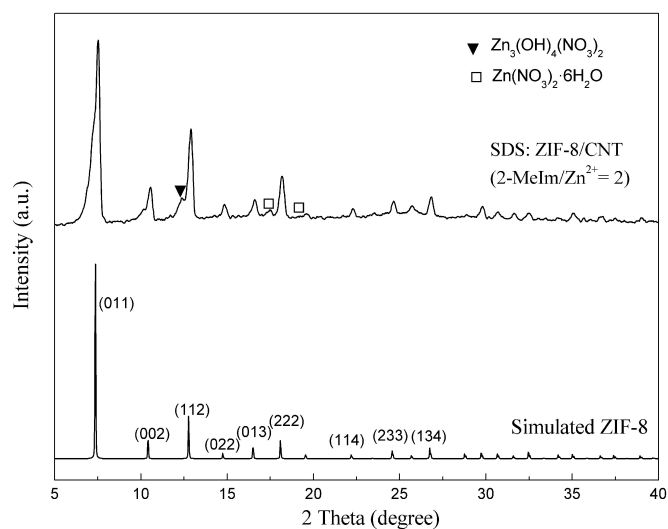

Figure S2. Major and minor phases in ZIF/CNT composite materials. PDF numbers for  $\text{Zn}_3(\text{OH})_4(\text{NO}_3)_2$  and  $\text{Zn}(\text{NO}_3)_2 \cdot 6\text{H}_2\text{O}$  are 52-0627 and 19-1464, respectively.

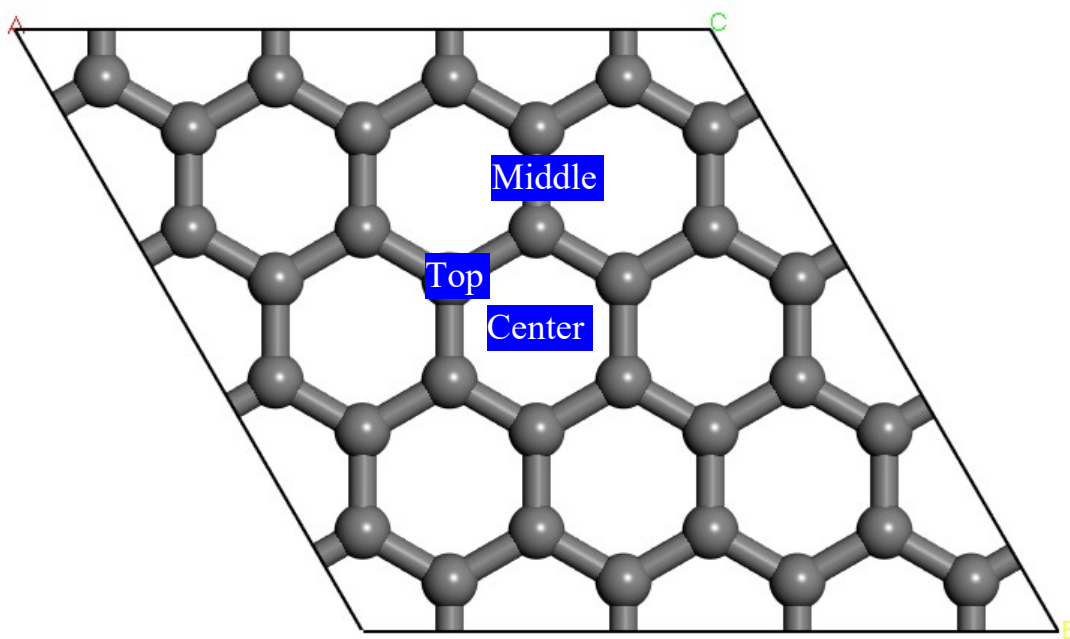

Figure S3. Top view of a single layer of graphene used in DFT calculations. Three possible adsorption positions are shown in this figure.

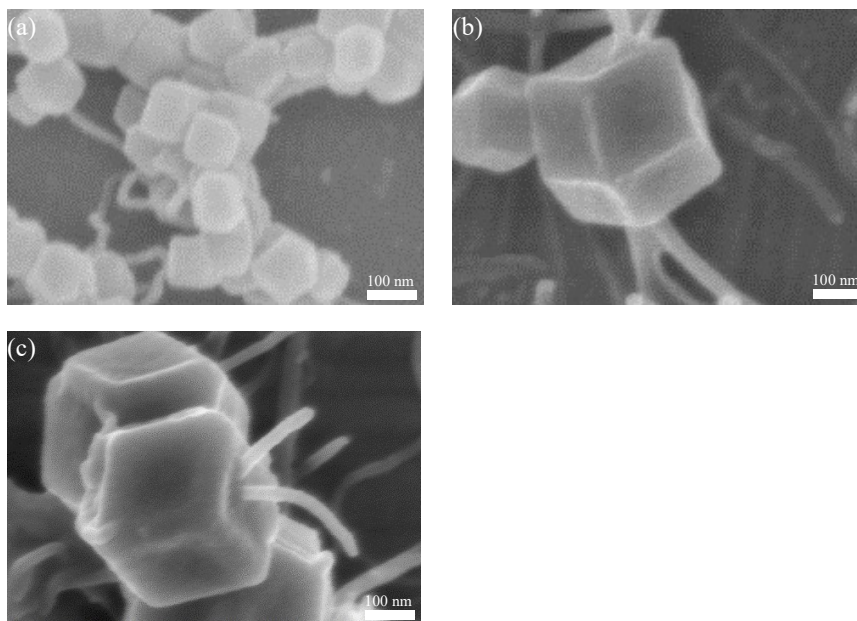

Figure S4. SEM images of the ZIF-8/CNT composite prepared by adding (a) PVP, (b) SDS, and (c) CTAB.

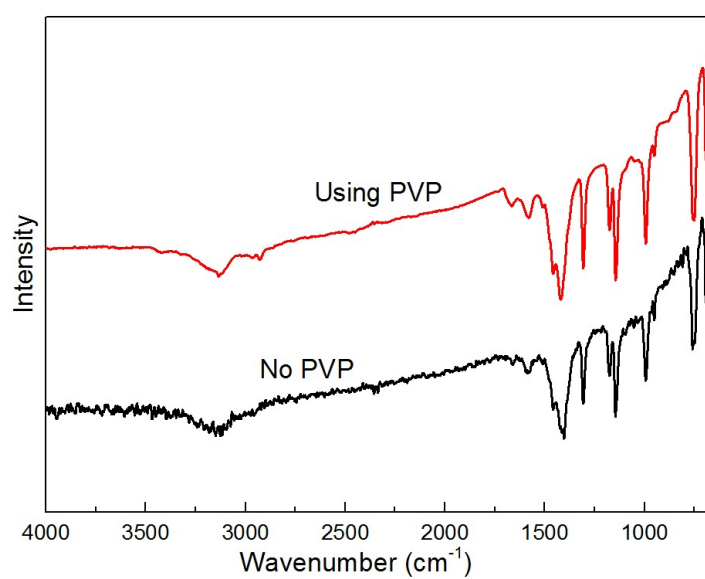

Figure S5. FT-IR spectra of ZIF-8/CNT synthesized with and without the addition of PVP.

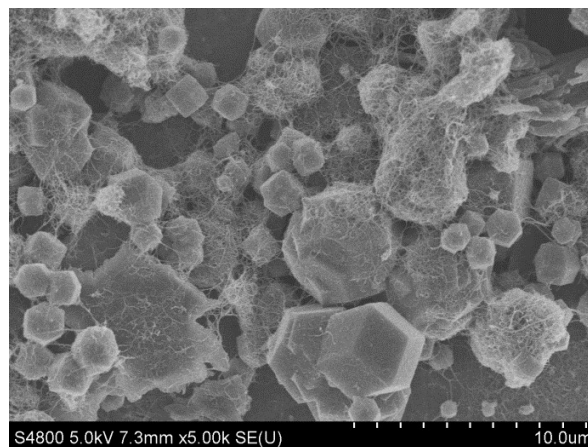

Figure S6. SEM image of the ZIF-8/CNT composite synthesized by adding 2-methylimidazole solution into  $\text{Zn}(\text{NO}_3)_2 \cdot 6\text{H}_2\text{O}$  solution premixed with CNTs. The additive agent is PVP.

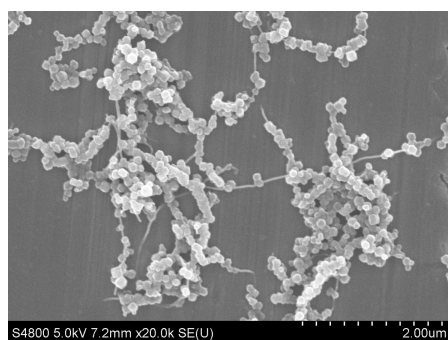

(a)

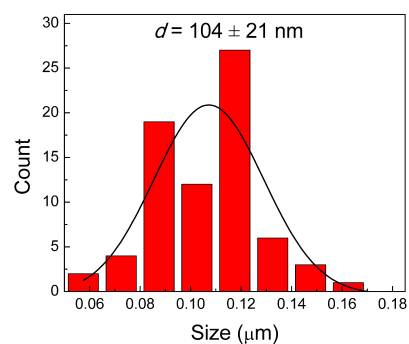

(b)

Figure S7. SEM image (a) with size distribution histograms (b) for the ZIF-8/CNT composite prepared using  $2\text{-MeIm}/\text{Zn}^{2+} = 70$  without any additive agent.
